# Supplementary material for: Hyaluronic Acid–Decorated Liposomes as Innovative Targeted Delivery System for Lung Fibrotic Cells
Source: PubMed Central journal article supplement (PMC6766933; doi:10.3390/molecules24183291), 2019-09-10
Supplement: molecules-24-03291-s001.pdf [file molecules-24-03291-s001.pdf]

1 *Supporting information*

2 **Setting the Basis to Use Hyaluronic Acid-Decorated**  
3 **Liposomes for Lung Fibrotic Disorders**

4 **Laura Pandolfi<sup>1§</sup>, Vanessa Frangipane<sup>1§</sup>, Claudia Bocca<sup>2</sup>, Alessandro Marengo<sup>3</sup>, Erika Tarro**  
5 **Genta<sup>3</sup>, Sara Bozzini<sup>1</sup>, Monica Morosini<sup>1</sup>, Maura D'Amato<sup>1</sup>, Simone Vitulo<sup>1</sup>, Manuela Monti<sup>4</sup>,**  
6 **Giuditta Comolli<sup>5</sup>, Maria Teresa Scupoli<sup>6,7</sup>, Elias Fattal<sup>9</sup>, Silvia Arpicco<sup>3\*</sup> and Federica Meloni<sup>1,8\*</sup>**

7 <sup>1</sup> Research Laboratory of lung diseases, section of cell biology, IRCCS Policlinico San Matteo Foundation,  
8 Pavia (Italy);

9 <sup>2</sup> Department of Clinical and Biological Sciences, University of Turin, Turin (Italy);

10 <sup>3</sup> Department of Drug Science and Technology, University of Turin (Italy);

11 <sup>4</sup> Laboratory of Biotechnology, Center of Regenerative medicine research, IRCCS San Matteo Foundation,  
12 Pavia (Italy);

13 <sup>5</sup> Experimental Research Laboratories, Biotechnology Area, IRCCS San Matteo Foundation, Pavia (Italy);

14 <sup>6</sup> Research Center LURM, Interdepartmental Laboratory of Medical Research, University of Verona, Verona  
15 (Italy)

16 <sup>7</sup> Department of Neurosciences, Biomedicine and Movement Sciences, University of Verona, Verona (Italy)

17 <sup>8</sup> Department of Internal Medicine, University of Pavia, Pavia (Italy)

18 <sup>9</sup> Institut Galien Paris-Sud, CNRS, Université Paris-Sud, Université Paris-Saclay, Châtenay-Malabry (France)

19

20 § These authors contributed equally

21 \*Correspondence: [silvia.arpicco@unito.it](mailto:silvia.arpicco@unito.it) Tel: +39 0116706668 (S.A.); [f.meloni@smatteo.pv.it](mailto:f.meloni@smatteo.pv.it) Tel.: +39  
22 0382501017 (F.M.)

23

24

25

26

**Table S1.** Characteristics of Liposomal Formulations (means  $\pm$  SD; n=3).

| Formulation | Mean particle size (nm) | Polydispersity index | Zeta potential (mV) |
|-------------|-------------------------|----------------------|---------------------|
| LIP         | 207 $\pm$ 2.3           | 0.112                | -27.2 $\pm$ 2.9     |
| LIP-HA4800  | 221 $\pm$ 1.4           | 0.172                | -10.1 $\pm$ 1.3     |
| LIP-HA14800 | 245 $\pm$ 1.9           | 0.175                | -24.6 $\pm$ 3.9     |

27

**Table S2.** Mean Fluorescence Intensity (MFI) of CD44 Expression Analyzed by Flow Cytometry.

| Cell line   | MFI   |
|-------------|-------|
| A549        | 55.35 |
| Calu-3      | 14.53 |
| 16-HBE      | 2.55  |
| BOS-LFs     | 56.72 |
| CTD-ILD-LFs | 77.71 |
| THP-1       | 61.11 |
| THP-1-PMA   | 74.46 |

28

29

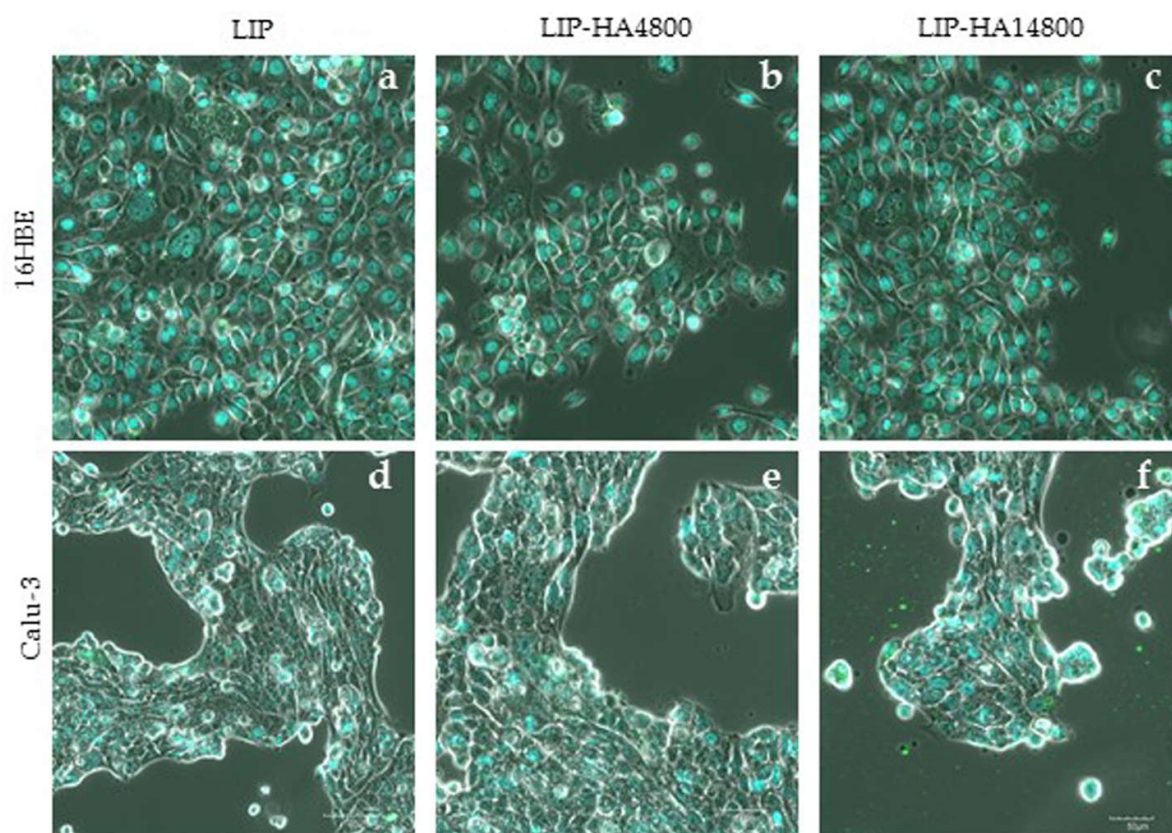

30

31

32

**Figure S1.** Liposomes internalization analyses by confocal microscopy on 16HBE (a-c) and Calu-3 (d-f) after 4 h of incubation. Scale bar = 50  $\mu$ m.

33

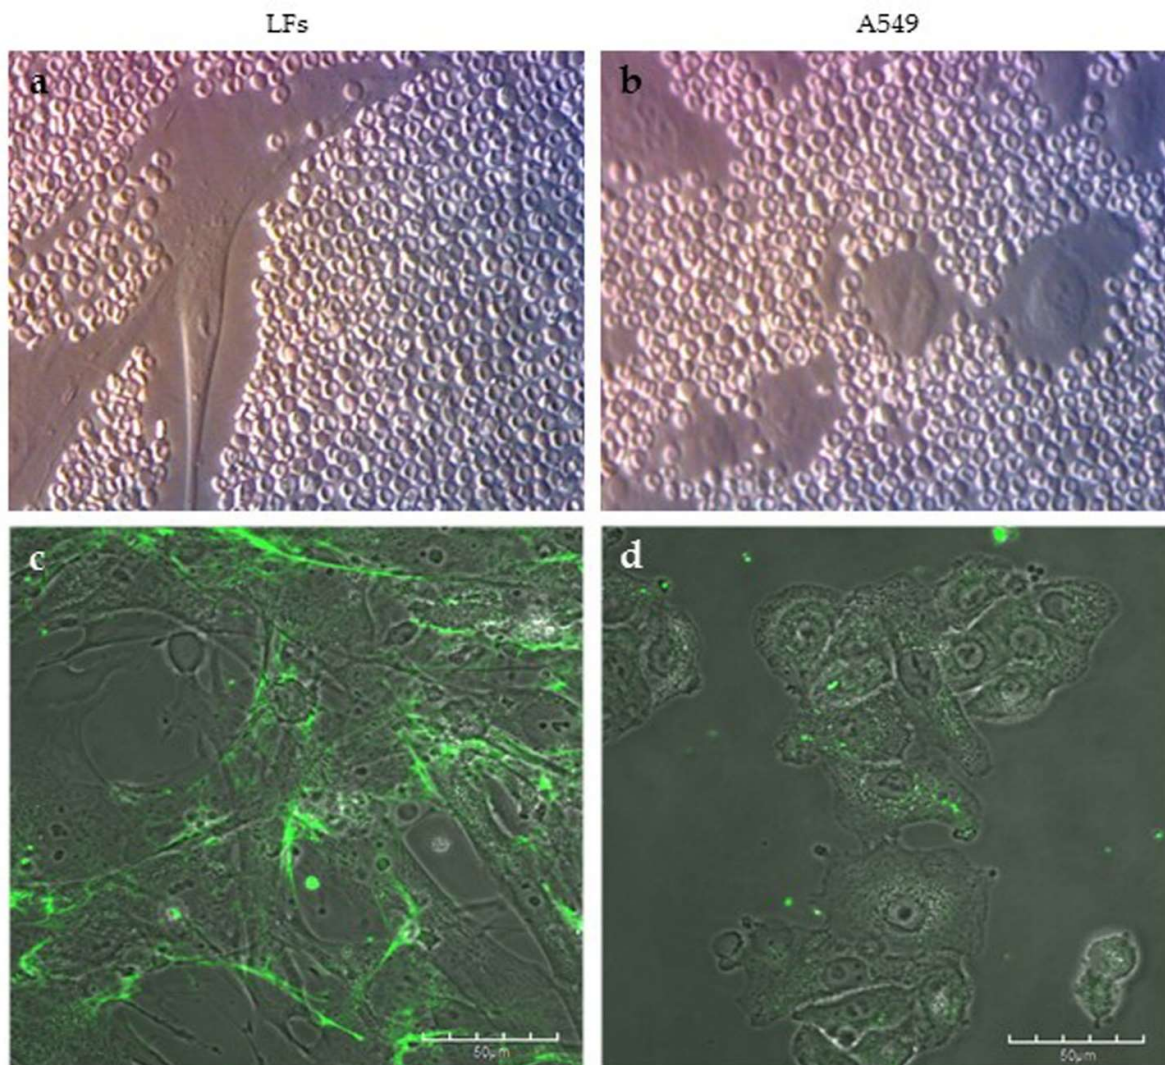

34

35 **Figure S2.** Pericellular coating (a,b) and fluorescent HA deposition (green signal, c,d) on LFs (a,c) and  
36 A549 (b,d). Scale bar = 50 μm.

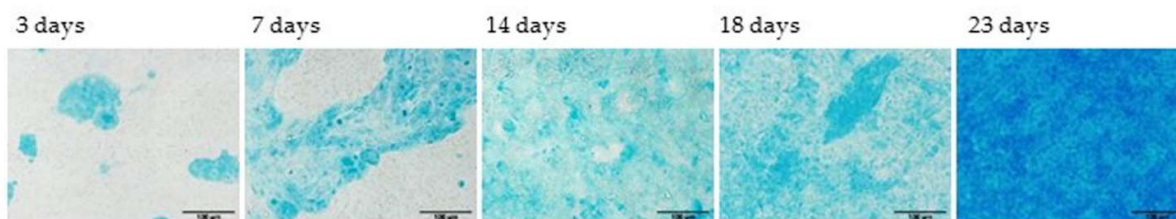

37

38 **Figure S3.** Alcian blue staining of mucus layer produced by Calu-3 cultivated in air-liquid interface  
39 configuration at different time points. Scale bar = 100 μm.
